# Supplementary material for: Binding Mechanism Elucidation of the Acute Respiratory Disease Causing Agent Adenovirus of Serotype 7 to Desmoglein-2
Source: PubMed Central journal article supplement (PMC7599583; doi:10.3390/v12101075), 2020-09-25
Supplement: viruses-12-01075-s001.pdf [file viruses-12-01075-s001.pdf]

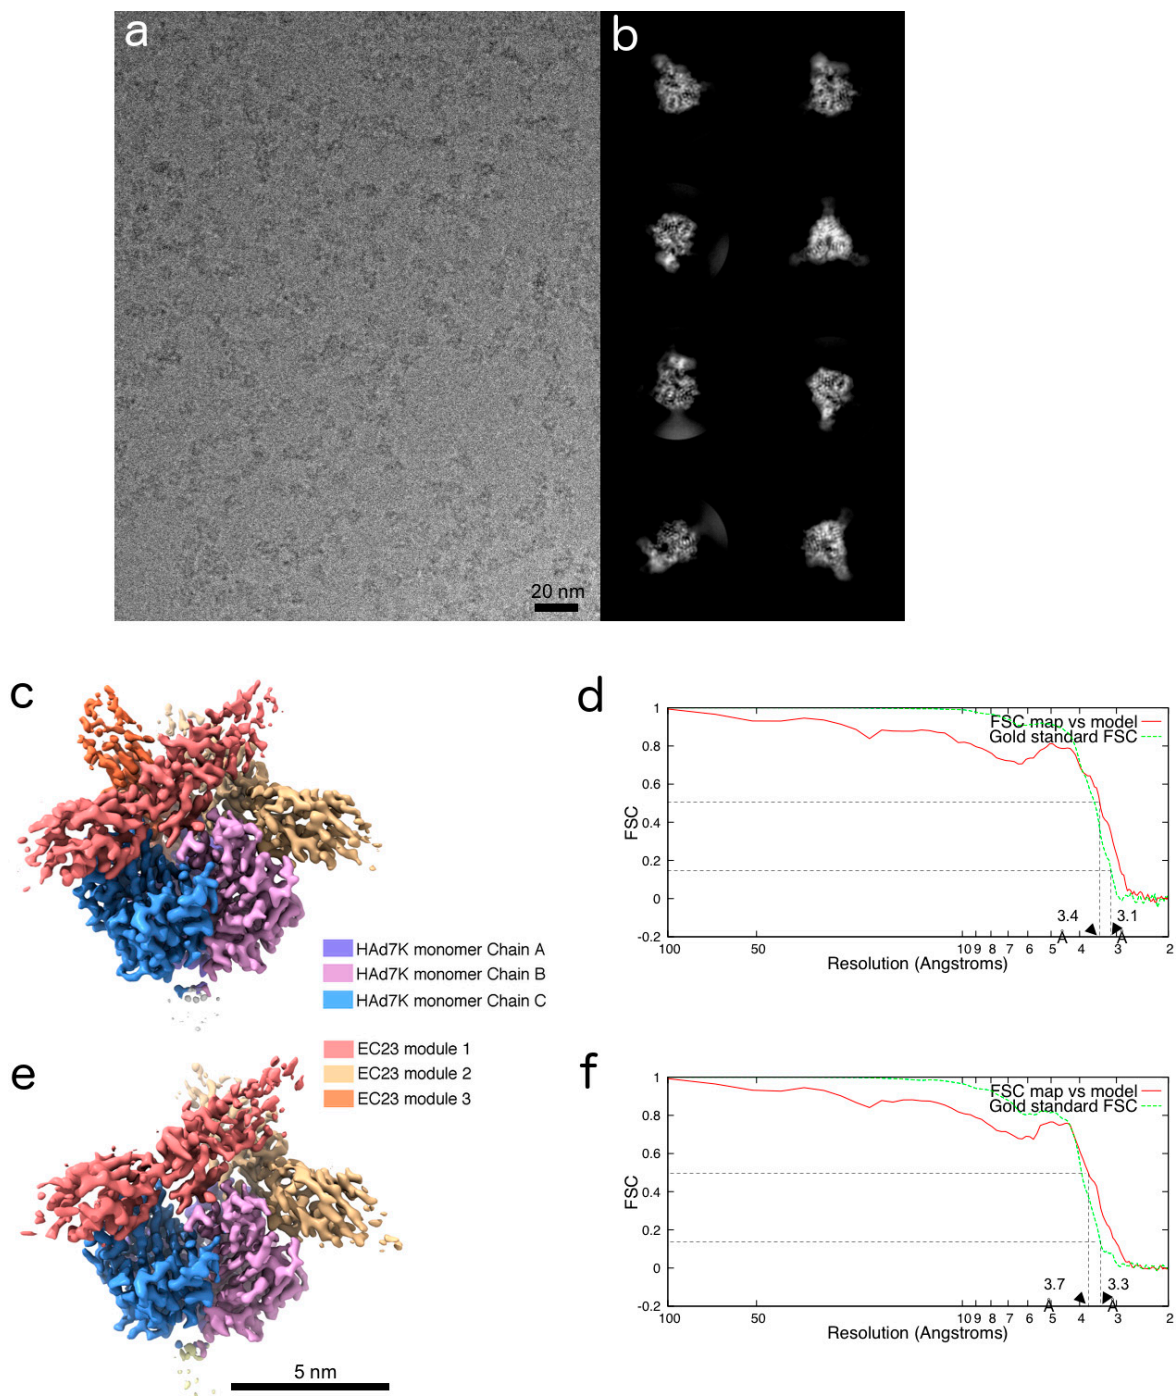

**Figure S1:** Cryo-EM micrograph, reconstruction and FSC calculation **(a):** Cryo-EM micrograph of HAd7K/EC23. **(b):** 2D class averages of HAd7K/EC23. **(c, e):** Isosurface representations of the cryo-EM 3D reconstructions of HAd7K-(EC23)<sub>3</sub> **(c)** and HAd7K-(EC23)<sub>2</sub> **(e)** colored by monomer. **(d, f):** Fourier Shell Correlation (FSC) curves for HAd7K-(EC23)<sub>3</sub> **(d)** and HAd7K-(EC23)<sub>2</sub> **(f)**.

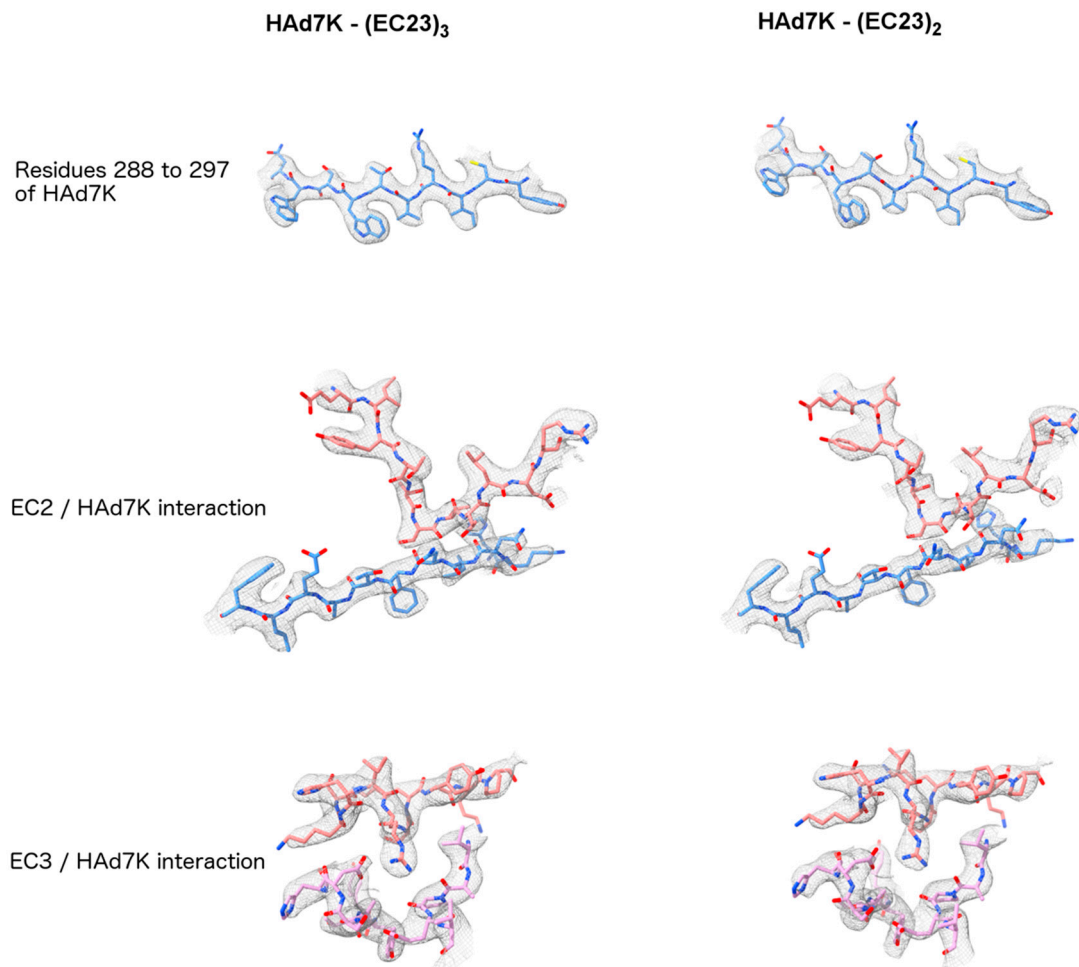

**Figure S2:** Zoomed views of the 3D reconstructions. Views on 3 different areas of HAd7K-(EC23)<sub>3</sub> (left column) and HAd7K-(EC23)<sub>2</sub> (right column). The cryo-EM density is represented in light grey. First row focuses on one  $\beta$  strand in HAd7K, second row on the interaction between EC2 (salmon) and HAd7K (blue) and third row on the interaction between EC3 (salmon) and HAd7K (pink).

**Table S1.** Summary of data collection and atomic model statistics

| Data collection                              |                                     |                           |
|----------------------------------------------|-------------------------------------|---------------------------|
| Microscope                                   | Krios G3 (ThermoFischer Scientific) |                           |
| Voltage (kV)                                 | 300                                 |                           |
| Magnification                                | 215,000x                            |                           |
| Unbinned pixel size                          | 0.325 Å/pixel                       |                           |
| Camera                                       | K2 Summit (Gatan Inc)               |                           |
| Exposure time                                | 3s                                  |                           |
| Number of frames                             | 30                                  |                           |
| Total dose (e <sup>-</sup> /Å <sup>2</sup> ) | 35                                  |                           |
| Image processing                             |                                     |                           |
|                                              | Had7k-(EC23) <sub>2</sub>           | Had7k-(EC23) <sub>3</sub> |
| EMDB                                         |                                     |                           |
| Symmetry                                     | C1                                  | C3                        |
| Final number of Particles                    | 97,190                              | 58,219                    |
| Map resolution in Å (FSC 0.143)              | 3.3                                 | 3.1                       |
| Model statistics                             |                                     |                           |
| PDB                                          |                                     |                           |
| Model resolution in Å (FSC 0.5)              | 3.7                                 | 3.4                       |

|                           |        |        |
|---------------------------|--------|--------|
| Ramachandran favored (%)  | 95.8   | 96.0   |
| Ramachandran outliers (%) | 0.2    | 0.8    |
| Rotamer outliers (%)      | 0      | 0      |
| C-beta deviations         | 0      | 0      |
| Rms on bond lengths       | 0.0072 | 0.0063 |
| Rms on bond angles        | 0.78   | 0.88   |
| Clashscore                | 6.95   | 5.29   |
| Molprobit score           | 1.67   | 1.56   |
